# Supplementary material
Source: PubMed Central journal article supplement (PMC4229712)
Supplement: Supp_Figure2.pdf [file Supp_Figure2.pdf]

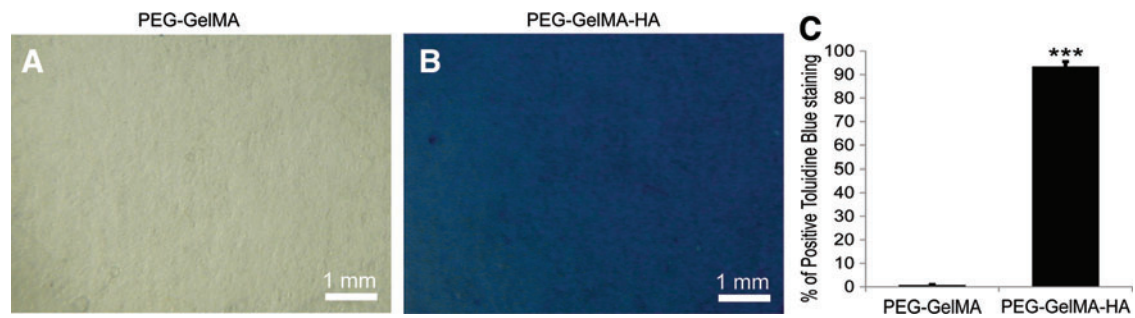

**SUPPLEMENTARY FIG. S2.** Toluidine blue staining of representative PEG-GelMA and PEG-GelMA-HA scaffolds. (A, B) Representative PEG-GelMA and PEG-GelMA-HA scaffolds stained with toluidine blue for detection of hyaluronic acid (HA), respectively. The positive stained region in blue was observed in PEG-GelMA-HA (B), but not in PEG-GelMA (A), indicating the presence of HA. (C) Percentage of positive toluidine blue staining per 22 mm<sup>2</sup> area surveyed was quantified between PEG-GelMA and PEG-GelMA-HA scaffolds ( $n=6$ ). Scale bars = 1 mm. Values are represented as mean  $\pm$  standard deviation (SD) (\*\*\*)  $p < 0.001$  with respect to PEG-GelMA) and analyzed by Student's  $t$ -test.
