# Supplementary material
Source: PubMed Central journal article supplement (PMC4229712)
Supplement: Supp_Figure3.pdf [file Supp_Figure3.pdf]

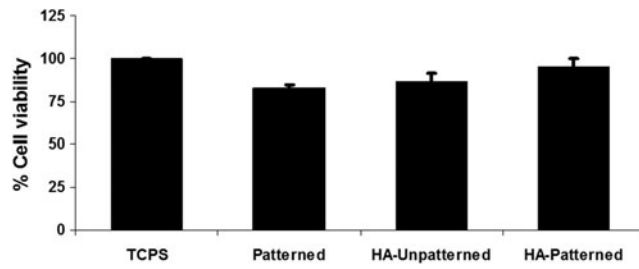

**SUPPLEMENTARY FIG. S3.** Cell viability of DPSCs seeded on different types of scaffolds. WST-1 assay showed no statistically significant difference in cell viability of DPSCs after 24-h seeding on scaffolds, comparing among cells seeded on scaffolds and TCPS. Cell viability presented as a percentage was measured by  $[(\text{OD of cells seeded on TCPS} - \text{OD of blank}) / (\text{OD of cells seeded on different scaffolds} - \text{OD of blank})] \times 100$ . OD, optical density or absorbance measured at a wavelength of 450 nm. Values are represented as mean  $\pm$  standard deviation (SD) from three different independent experiments ( $n=3$ ) and analyzed by one-way ANOVA.
