# Supplementary material
Source: PubMed Central journal article supplement (PMC4229712)
Supplement: Supp_Figure4.pdf [file Supp_Figure4.pdf]

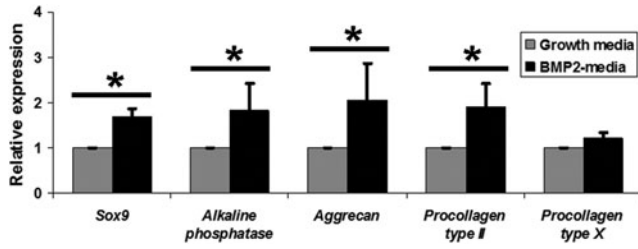

**SUPPLEMENTARY FIG. S4.** Chondrogenic differentiation potential of DPSCs cultured in growth media versus BMP-2 media. DPSCs cultured in BMP-2 media after 21 days significantly upregulated chondrogenic genes, *Sox9*, *Alkaline phosphatase*, *Aggrecan*, and *Procollagen type II*, but upregulation of *Procollagen type X*, a marker of mature chondrocytes, was not significant. Values analyzed by Student's *t*-test are represented as mean  $\pm$  SD from three independent experiments ( $n=3$ ), \* $p < 0.05$  with respect to growth media.
