# Supplementary material
Source: PubMed Central journal article supplement (PMC4229712)
Supplement: Supp_Figure5.pdf [file Supp_Figure5.pdf]

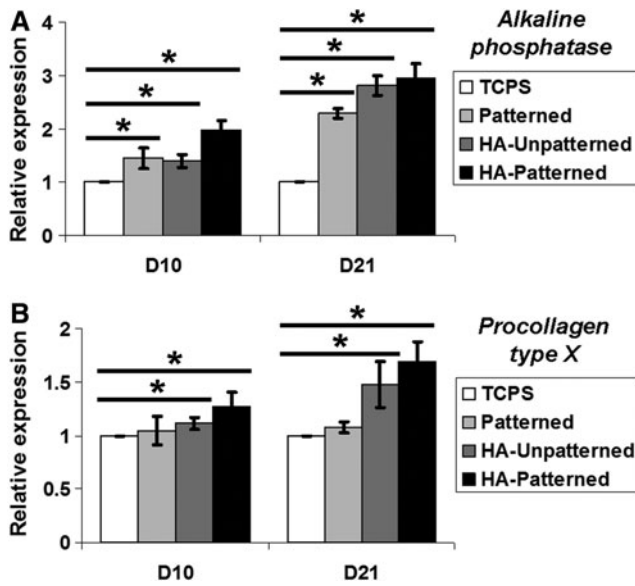

**SUPPLEMENTARY FIG. S5.** *Alkaline phosphatase* and *Procollagen type X* expression in differentiated DPSCs seeded on different scaffold conditions at day 10 and 21. **(A)** *Alkaline phosphatase* was significantly upregulated in DPSCs cultured on all different scaffolds compared with TCPS, but no difference was observed in *Alkaline phosphatase* expression among scaffolds. **(B)** *Procollagen type X* significantly increased in DPSCs cultured on HA-based scaffolds compared with TCPS. No difference was observed in the expression of *Procollagen type X* between TCPS and patterned scaffolds, as well as both HA-based scaffolds. Values are represented as mean  $\pm$  SD from three independent experiments ( $n=3$ ),  $*p < 0.05$  with respect to indicated groups by Student's *t*-test or one-way ANOVA.
