# Supplementary material
Source: PubMed Central journal article supplement (PMC4229712)
Supplement: Supp_Figure6.pdf [file Supp_Figure6.pdf]

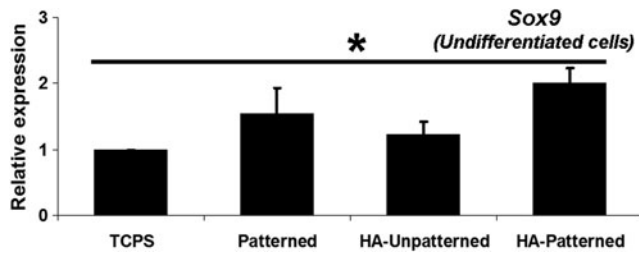

**SUPPLEMENTARY FIG. S6.** *Sox9* expression in undifferentiated DPSCs seeded on different scaffold conditions after 2 days. DPSCs cultured on PEG-GelMA patterned, PEG-GelMA-HA unpatterned, and PEG-GelMA-HA patterned in stem cell media significantly increased the level of *Sox9* expression compared with DPSCs on TCPS. The highest *Sox9* level was expressed in DPSCs cultured on PEG-GelMA-HA patterned compared with other scaffold conditions, suggesting the synergistic effect in chondrogenic potential between nanopattern and HA. Values are represented as mean  $\pm$  SD from three independent experiments ( $n=3$ ), \* $p < 0.05$  with respect to indicated groups by one-way ANOVA.
