# Supplementary material
Source: PubMed Central journal article supplement (PMC4229712)
Supplement: Supp_Table1.pdf [file Supp_Table1.pdf]

## Supplementary Data

SUPPLEMENTARY TABLE S1. MOUSE-SPECIFIC QUANTITATIVE REVERSE-TRANSCRIPTASE  
POLYMERASE CHAIN REACTION PRIMER SEQUENCES

| <i>Gene</i>                     | <i>Forward primer (5' → 3')</i> | <i>Reverse primer (5' → 3')</i> | <i>GenBank<br/>accession<br/>number</i> |
|---------------------------------|---------------------------------|---------------------------------|-----------------------------------------|
| <i>Gapdh</i>                    | GGGAAGCCCATCACCATCT             | GCCTCACCCCATTTGATGTT            | NM_008084                               |
| <i>Sox9</i>                     | GCAGACCAGTACCCGCATCT            | CCTCCACGAAGGGTCTCTTCT           | NM_008509                               |
| <i>Alkaline<br/>phosphatase</i> | GTGACTACCACTCGGGTGAAC           | CTCTGGTGGCATCTCGTTATC           | NM_007431                               |
| <i>Aggrecan</i>                 | CCCATGTGTGGGTGACAAAG            | GACACACCTCGGAAGCAGAAG           | NM_007424                               |
| <i>Procollagen<br/>type II</i>  | GTGTGTGTGACACTGGGAATGTC         | GGTTGAGGCAGTCTGGGTCTT           | NM_031163                               |
| <i>Procollagen<br/>type X</i>   | TTCTGCTGCTAATGTTCTTGACC         | GGGATGAAGTATTGTGTCCTGG          | NM_009925                               |
| <i>Twist</i>                    | GACGAGCTGGACTCCAAGATG           | GCCCCTCTGGGAATCTCTGT            | NM_011658                               |
| <i>Snail</i>                    | TGACCTCGCTGTCCGATGA             | GTGCTTGTGGAGCAAGGACAT           | NM_011427                               |
| <i>Slug</i>                     | CACTGTGATGCCCAGTCTAGGA          | GCAGATGTGCCCTCAGGTTT            | NM_011415                               |
| <i>Nanog</i>                    | AAGCGGTGGCAGAAAAACC             | GTGCTGAGCCCTTCTGAATCA           | NM_028016                               |
